# Supplementary material for: The self-assembly of single-walled metal–organic nanotubes constructed from CuCl2 chains and ditetrazoles
Source: Royal Society of Chemistry journal article supplement (doi:10.1039/c1ce05921a), 2011-01-01
Supplement: c1ce05921a.pdf [file c1ce05921a.pdf]

## Electronic Supplementary Information

### The Self-Assembly of Single-Walled Metal-Organic Nanotubes Constructed from CuCl<sub>2</sub> Chains and Ditetrazoles

Bing Li,\*<sup>a,b</sup> Shun-Wei Chen,<sup>b</sup> Zheng Chen,<sup>a</sup> Jie Chen<sup>a</sup>, Jian-Zhong Guo<sup>a</sup> and Li Liu\*<sup>a</sup>

<sup>a</sup> College of Sciences, Zhejiang A & F University, Lin'an, Zhejiang, 311300, P. R. China. E-mail: libingzjfc@163.com; Fax: (+86) 571-63732775

<sup>b</sup> Zhejiang Provincial Key of Biological and Chemical Utilization of Forest Resources, Zhejiang Forestry Academy, 310023, P. R. China.

Synthesis of 1,3-di(1H-tetrazol-1-yl)benzene

**Fig. S1.** The Coordination environment of the Cu<sup>II</sup> ion in **1**.

**Fig. S2.** The ligand of DTB in **1**.

**Fig. S3.** (4,4) topological diagram of **1**.

**Fig. S4.** The temperature evolution of the inverse magnetic susceptibility  $\chi_m^{-1}$  for **1** between 2.6 and 300 K, and the solid line was generated from the best fit by the Curie-Weiss expression in the range of 2.6 and 300 K with the Curie constant  $C = 0.385 \text{ emu mol}^{-1} \text{ K}$  and the Weiss constant  $\theta = 2.44 \text{ K}$ .

**Fig. S5.** Field dependence of the magnetization for complex **1** at 1.8 K.

**Fig. S6.** Temperature dependences of in-phase ( $\chi'_m$ ) (a) and out-of-phase ( $\chi''_m$ ) (b) signals of the AC magnetic susceptibility measurements at 1–1500 Hz in field of 0 G.

**Fig. S7.** Thermogravimetric (TG) curve of **1** measured in the range of 30–800 °C under air atmosphere with the heating rate of 10 °C/min.

**Fig. S8.** PXRD patterns of the bulk product and the calculated pattern based on the single-crystal solution of **1**.

**Fig. S9.** IR spectra of **1** and DTB.

### Synthesis of 1,3-di(1H-tetrazol-1-yl)benzene

m-Phenylenediamine of 8.0 g (73.8 mmol), 30.6 g triethyl orthoformate (206.7 mmol) and 12.6 g sodium azide (192 mmol) were dissolved in 130 ml glacial acetic acid and stirred at 90 °C for 10 h. The suspension was then poured into 1 L of water and the resulting precipitate was collected by filtration, washed with cold water<sup>[1]</sup>.

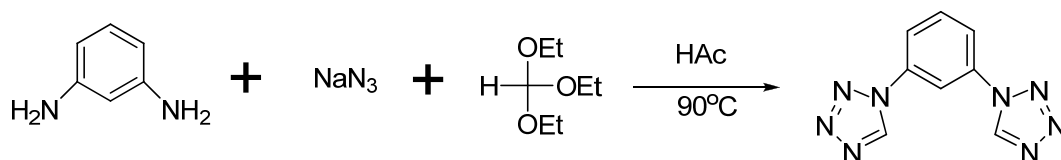

**Scheme 1.** synthesis of 1,3-di(1H-tetrazol-1-yl)benzene

- 1 P. L. Franke, J. G. Haasnoot, A. P. Zuur. *Inorg. Chim. Acta.*, 1982,5,59.

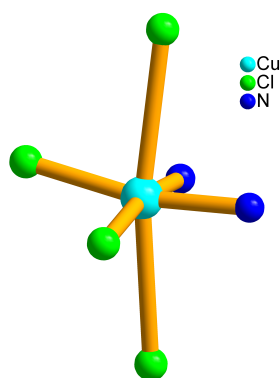

**Fig. S1.** The Coordination environment of the Cu<sup>II</sup> ion in 1.

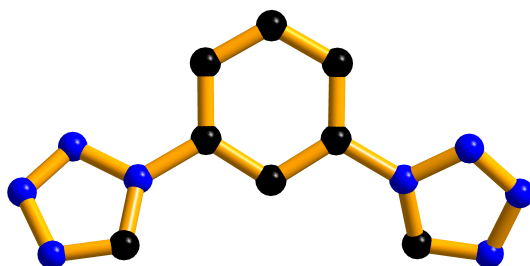

**Fig. S2.** The ligand of DTB in 1.

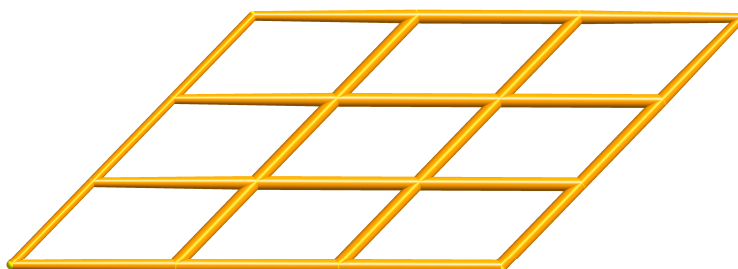

**Fig. S3.** (4,4) topological diagram of 1.

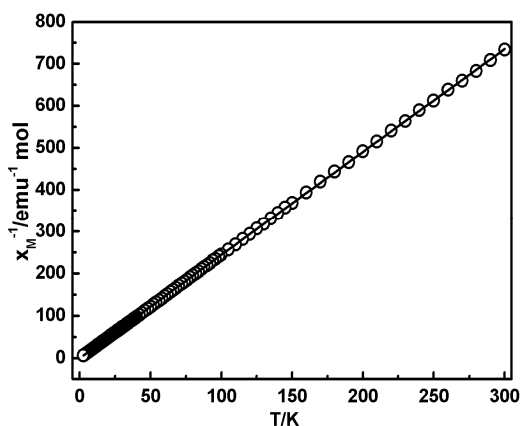

**Fig. S4.** The temperature evolution of the inverse magnetic susceptibility  $\chi_m^{-1}$  for **1** between 2.6 and 300 K, and the solid line was generated from the best fit by the Curie-Weiss expression in the range of 2.6 and 300 K with the Curie constant  $C = 0.367 \text{ emu mol}^{-1} \text{ K}$  and the Weiss constant  $\theta = 0.407 \text{ K}$ .

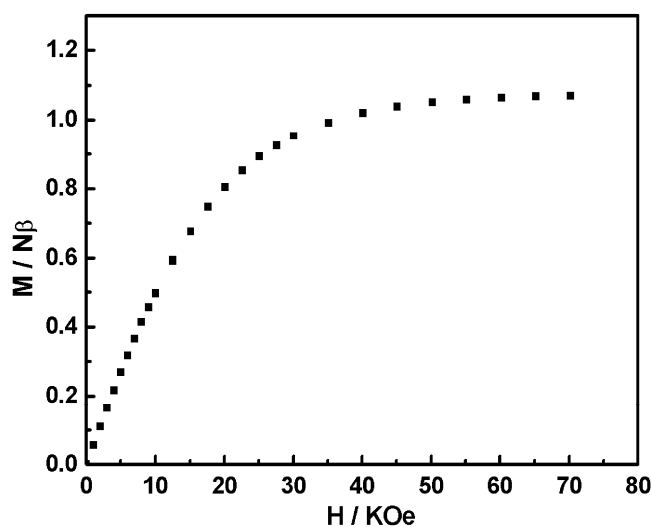

**Fig. S5.** Field dependence of the magnetization for complex **1** at 1.8 K.

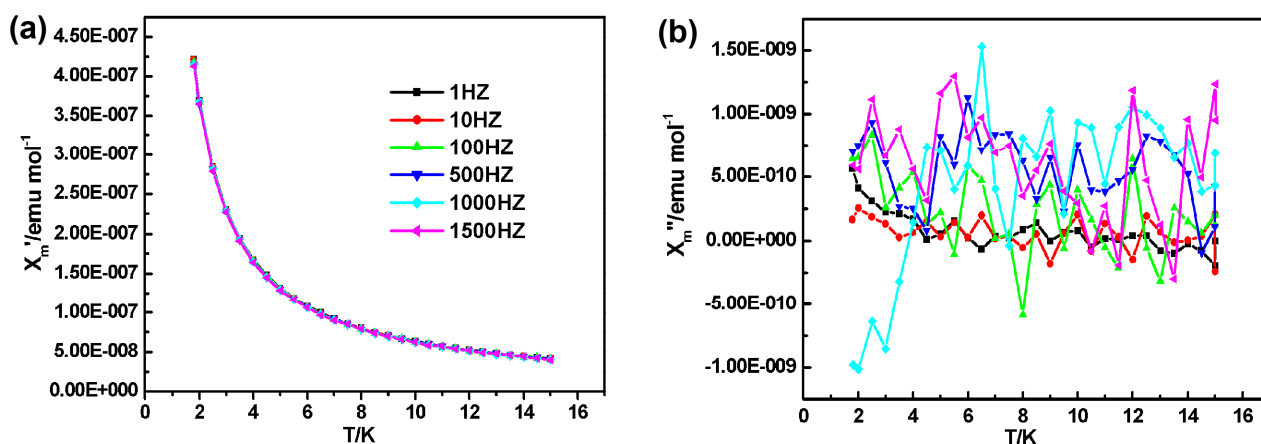

**Fig. S6.** Temperature dependences of in-phase ( $\chi'_m$ ) (a) and out-of-phase ( $\chi''_m$ ) (b) signals of the AC magnetic susceptibility measurements at 1–1500 Hz in field of 0 G.

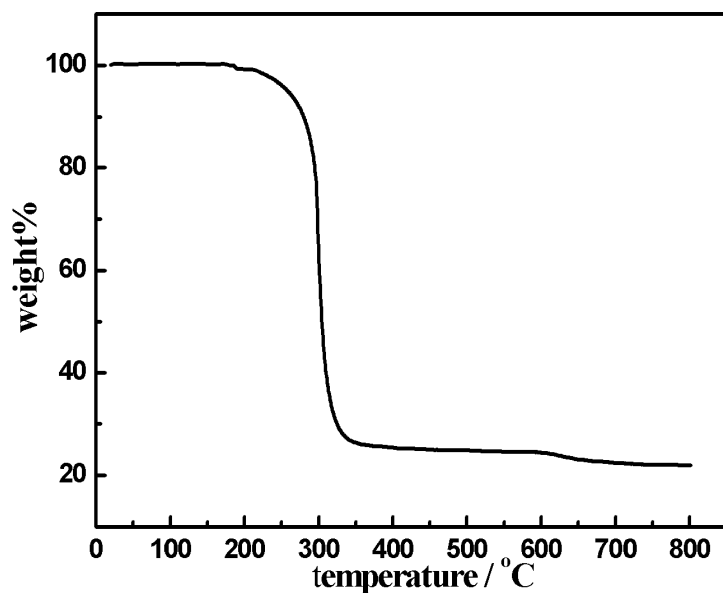

**Fig. S7.** Thermogravimetric (TG) curve of **1** measured in the range of 30–800 °C under air atmosphere with the heating rate of 10 °C/min.

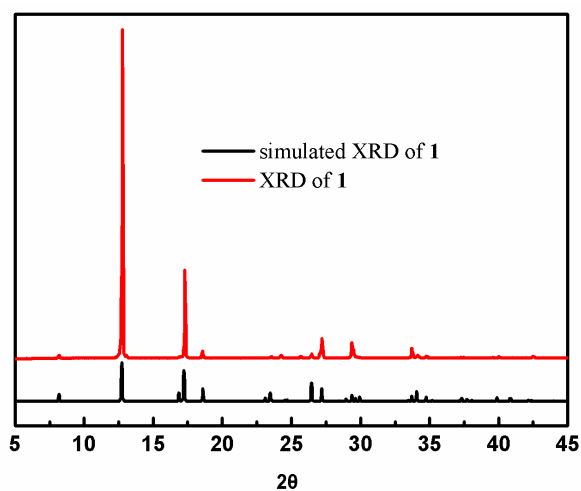

**Fig. S8.** PXRD patterns of the bulk product and the calculated pattern based on the single-crystal solution of **1**.

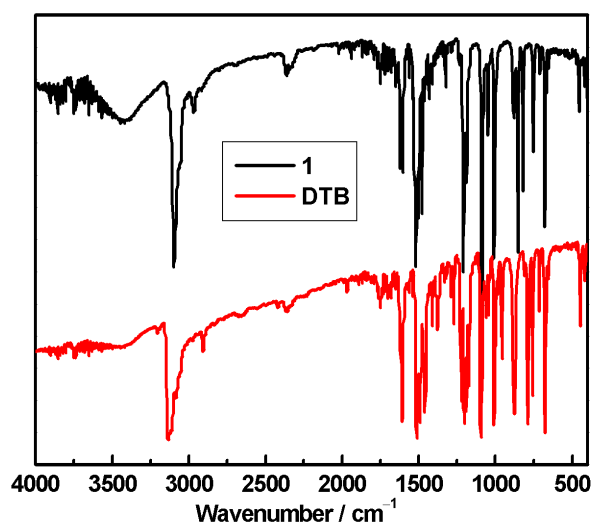

**Figure S9.** IR spectra of **1** and DTB.
